# Supplementary material for: Simplified Purification of Glycoprotein-Modified Ferritin Nanoparticles for Vaccine Development
Source: PubMed Central journal article supplement — Biochemistry. 2022 Aug 12;62(2):292–9. doi: 10.1021/acs.biochem.2c00241 (PMC9850919; doi:10.1021/acs.biochem.2c00241), 2022-08-12
Supplement: bi2c00241_si_001.pdf [file bi2c00241_si_001.pdf]

## **Supplementary Information:**

### **Simplified Purification of Glycoprotein-modified Ferritin Nanoparticles for Vaccine Development**

Payton Weidenbacher<sup>#1,2</sup>, Sriharshita Musunuri<sup>#1,3</sup>, Abigail E. Powell<sup>1,3</sup>, Shaogeng Tang<sup>1,3</sup>,  
Jonathan Do<sup>1,3</sup>, Mrinmoy Sanyal<sup>1,3</sup>, Peter S. Kim<sup>1,3,4,\*</sup>

<sup>#</sup> These authors contributed equally, <sup>1</sup> Stanford ChEM-H, Stanford University, Stanford, CA 94305, USA, <sup>2</sup> Department of Chemistry, Stanford University, Stanford, CA 94305, USA, <sup>3</sup> Department of Biochemistry, School of Medicine, Stanford University, Stanford, CA 94305, USA, <sup>4</sup> Chan Zuckerberg Biohub, San Francisco, CA 94158, USA, \* Corresponding author (kimpeter@stanford.edu)

Supplemental Information

| Supplemental Table 1                                                                                                                                                                                        |                                                    |                                                       |
|-------------------------------------------------------------------------------------------------------------------------------------------------------------------------------------------------------------|----------------------------------------------------|-------------------------------------------------------|
| Plasmid description                                                                                                                                                                                         | Plasmid name (HA – based on accession ID KF356052) | Plasmid name (spike – based on accession ID QJE39038) |
| His-1 –<br>GGSHHHHHGGS was inserted into <i>H. Pylori</i> ferritin sequence between pos. 71 and 72 (QLT–SIS). N-terminus of ferritin starts at position 5 (DIIKL...) as previously described <sup>1</sup> . | HA-His-1-Fer                                       | spike-His-1-Fer                                       |
| His-2 –<br>As with His-1 except the insertion is between pos. 77 and 78 (APE–HKF).                                                                                                                          | HA-His-2-Fer                                       | spike-His-2-Fer                                       |
| His-3 –<br>As with His-1 except the insertion is between pos. 78 and 79 (PEH–KFE).                                                                                                                          | HA-His-3-Fer                                       | spike-His-3-Fer                                       |
| His-4 –<br>As with His-1 except the insertion is between pos. 147 and 148 (GNE–NHG).                                                                                                                        | HA-His-4-Fer<br>Also<br>HA-His-4.6-Fer             | spike-His-4-Fer<br>Also<br>spike-His-4.6-Fer          |
| His-4.4 –<br>As with His-4 except the insertion is GGSHHHHGGS                                                                                                                                               | HA-His-4.4-Fer                                     | HA-His-4.4-Fer                                        |
| His-4.5 –<br>As with His-4 except the insertion is GGSHHHHHGGS                                                                                                                                              | HA-His-4.5-Fer                                     | spike-His-4.5-Fer                                     |
| His-4.7 –<br>As with His-4 except the insertion is GGSHHHHHHHGGS                                                                                                                                            | HA-His-4.7-Fer                                     | spike-His-4.7-Fer                                     |
| His-4.8 –<br>As with His-4 except the insertion is GGSHHHHHHHHHGGS                                                                                                                                          | HA-His-4.8-Fer                                     | spike-His-4.8-Fer                                     |

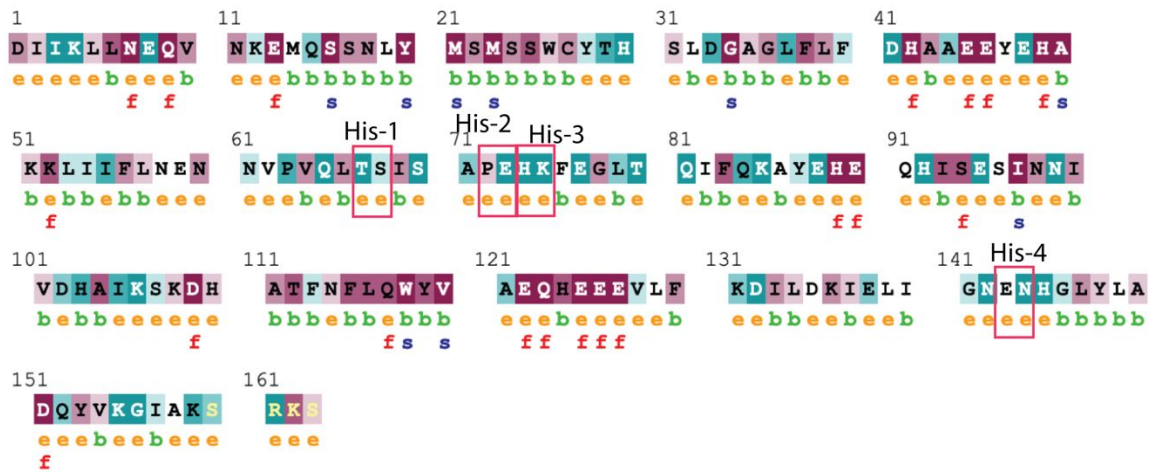

**The conservation scale:**

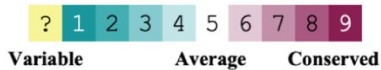

Supplementary Figure 1 – A conservation analysis of *H. pylori* ferritin generated using the ConSurf server with related counterparts identifies residues that are highly variable. Boxes indicate sites between which the polyhistidine insertions were made. Selections were made based on the surface exposure, flexibility, conservation, and computational modeling (Figure 1). Exposed (e), buried (b), predicted functional (f), predicted structurally important (s).

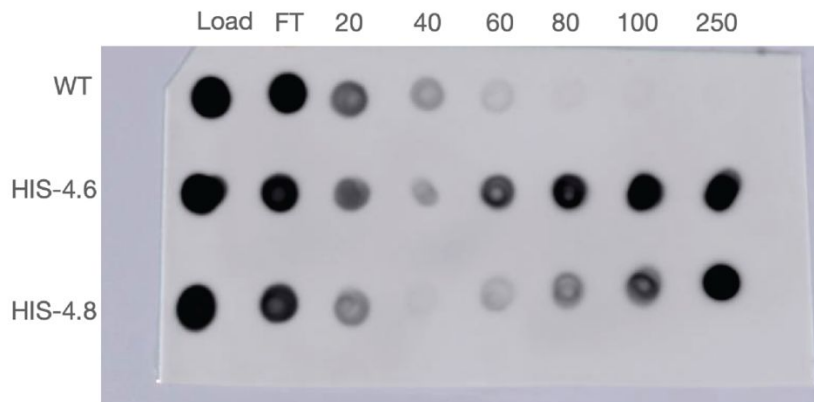

Supplementary Figure 2 – A dot blot demonstrating that an octahistidine insertion shows superior wash stability to a hexahistidine insertion for spike-His-Fer. Columns demonstrate the Load, flow through (FT), wash with 20mM, 40mM, 60mM, 80mM, 100mM, or elution with 250mM imidazole. Less protein dissociated from the column during the higher wash concentrations for the spike-His4.8-Fer (row 3) compared to spike-His4.6-Fer (row 2).

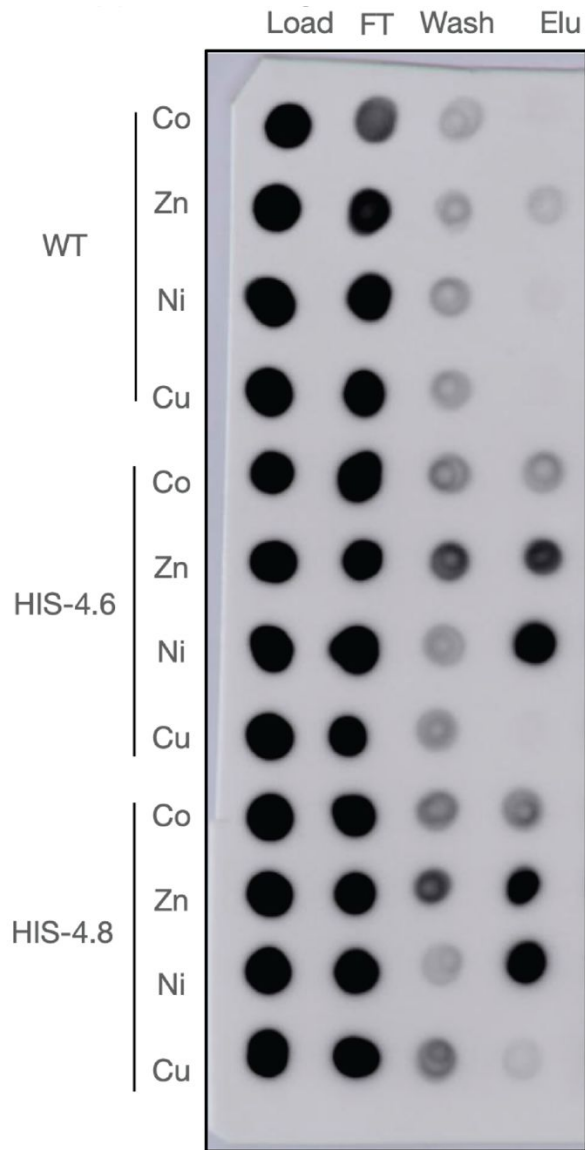

Supplementary Figure 3 – A dot blot demonstrating that Ni<sup>2+</sup>-coordinated resin facilitated optimal purification compared to other divalent cations. Columns demonstrate the Load, flow through (FT), wash (Wash), and eluate (Elu) from cube-bio resins containing either Co<sup>2+</sup>, Zn<sup>2+</sup>, Ni<sup>2+</sup>, or Cu<sup>2+</sup>. Purifications were conducted with either the WT-spike-Fer (showing no elution) or His-4.6 or His-4.8. Ni<sup>2+</sup>-coordinated resin facilitated maximal purification.

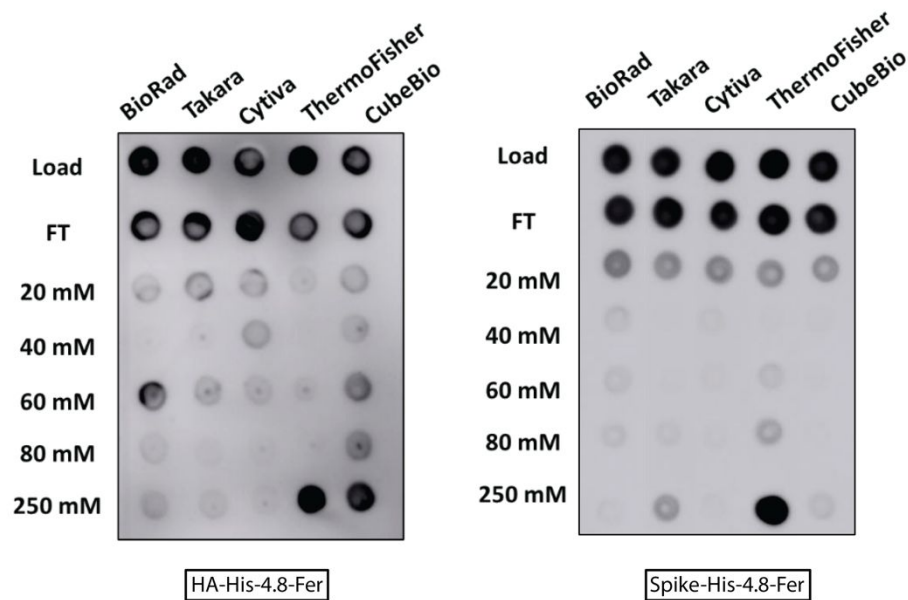

Supplementary Figure 4 – A dot blot demonstrating that ThermoFisher His-Pur resin was the optimal  $\text{Ni}^{2+}$ -coordinated resin among competitors. Columns show purifications from  $\text{Ni}^{2+}$ -coordinated resins from a range of vendors. Rows depict the Load, flow through (FT), wash with 20mM, 40mM, 60mM, 80mM imidazole, and elution (250mM). HA-His-4.8-Fer is shown in the left panel and spike-His4.8-Fer is shown in the right panel. Both nanoparticles were purified best using the ThermoFisher resin. Some resins could not accommodate nanoparticle purification.

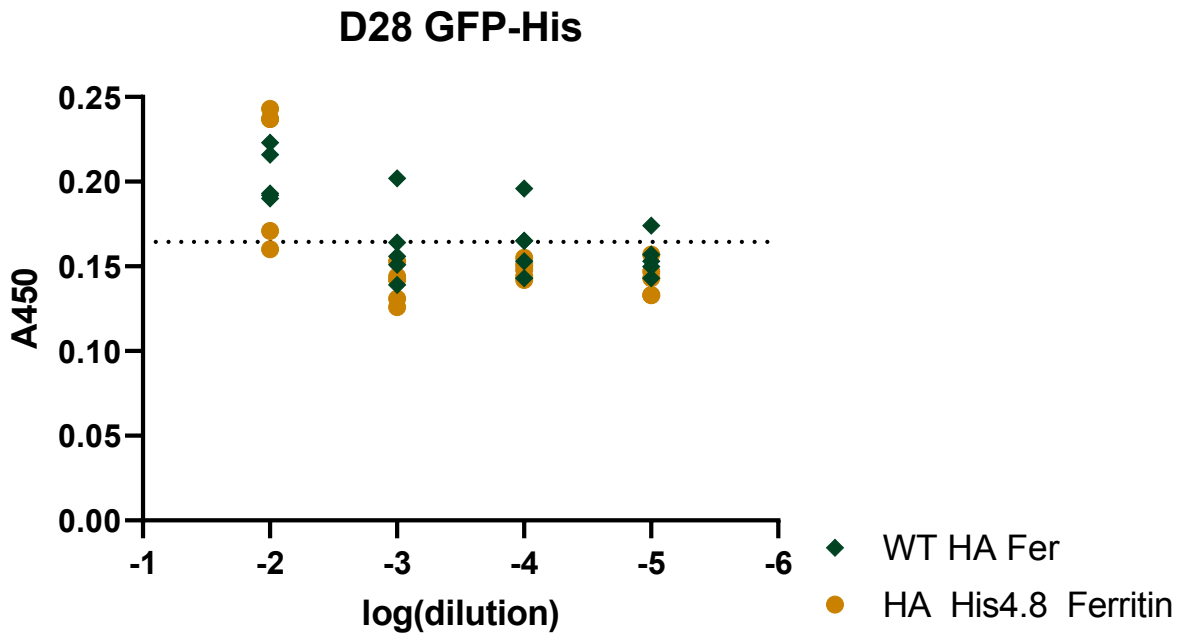

Supplementary Figure 5 – ELISA binding against His-tagged sfGFP protein for serum from mice immunized with WT-HA-Fer (green) and HA-His-4.8-Fer (yellow) on day 28. Dotted line indicates the average signal from preimmunization serum from all animals (negative control). Incubation with mouse IgG1 anti-His Ab served as the positive control and resulted in an A450 signal of 2.6 (not shown). The binding results demonstrate that the two immune responses were similar, and that the HA-His-4.8-Ferritin protein does not elicit a significant anti-His-Tag response.

```

P.furiosus      --GLSERMLKALNDQLNRELYSAYLYFAMAAYFEDLGLEGFANWMKAQAEFEIIGHALRFY      58
A.fulgidus     MASISEKMVEALNRQINAEIYSAYLYLSMASYFDSIGLKGFSNWMRVQWQEELMHAMKMF      60
H.pylori       -----DIIKLLNEQVNKEMQSSNLYMSMSWCYTHSLDAGLFLFDHAAEEYEHAKKLI      54
E.coli         --MLKPEMIEKLNQMNLELYSSLLYQQMSAWCSYHTFEGAAAFRRRHAQEEMTHMQRLF      58
                ::: ** **: * : * : * : * : * : * : * : * : * : * : * : * : * :
                His-1 His-2 His-3
P.furiosus     NYIYDKNGRVELDEIPKPKKEWESPLKAFEAAYEHEKFI SKSIYELAALAEEEKDYSTRA      118
A.fulgidus     DFVSEGRGRVKLYAVEEPPSEWDSPLAAFEHVYEHEVNVTKRIHELVEAMQEKDFATYN      120
H.pylori       IFLNENNVPVQLTISAPEHKFEGLTQIFQKAYEHEQHISESINNIVDHAIKSKDHATFN      114
E.coli         DYLTDTGNLPRINTVESPF AEYSSLDLDFQETKHEQLITQKINELAHAAAMTNDYPTFN      118
                :: : . . : : * : : * : * : * : * : * : * : * : * : * : * : *
                His-4
P.furiosus     FLEWFINEQVEEEASVKKILDKLKFADSPQILFMLDKEL SARAPKLPGLMQGGE      174
A.fulgidus     FLQWYVAEQVEEEASALDIVEKLRLLIGEDAAALLFLDKELSLRQFTPPAEEEK---      173
H.pylori       FLQWYVAEQHEEEVLFKDIIDKIELIGNENHGLYLADQYVKGIAKSRKS-----      163
E.coli         FLQWYVSEQHEEKLFKSIIDKLSLAGKSGEGLYFIDKELSTLDTQN-----      165
                **: * : * : * : * : * : * : * : * : * : * : * : * : * :

```

His-4

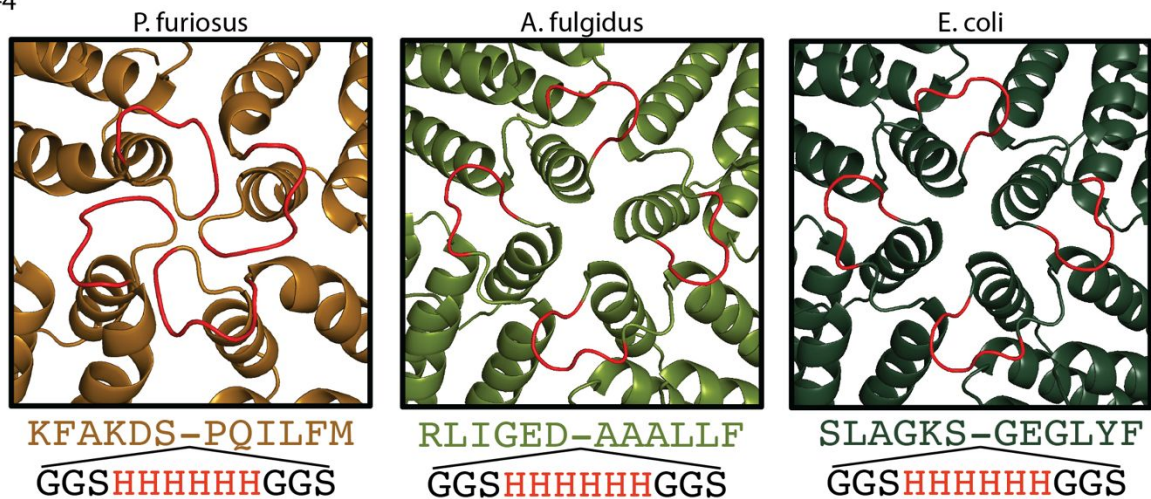

Supplementary Figure 6 – Sequence alignment of ferritin from other bacteria identifies His.4 as a homologous potential insertion site in other ferritins. (Top) A sequence alignment produced using Clustal Omega<sup>2</sup> for ferritin from *P. furiosus*, *A. fulgidus*, *E. Coli*. and *H. pylori*. *H. pylori* starts at position 5, the position of the glycoprotein fusion. (Bottom) The ferritin monomers for each of the bacterial ferritins was modeled using using RosettaRemodel (PDB ID: *P. furiosus* – 2JD6, *A. fulgidus* – 3KX9, *E. Coli* – 1EUM). Polyhistidine insertions of length 6 (6xHis) were made at each of the sequence-derived loop sites including the three flanking residues on either side to facilitate a mobile backbone. Ten structures were generated for each site, the mutated monomers were then multimerized and relaxed in Rosetta. Modeling demonstrates site His-4 has high homology between bacterial ferritins and may work for installation into other bacterial ferritins.



## *Sequences*

### **spike-Ferritin protein**

MFVFLVLLPLVSSQCVNLTTRTQLPPAYTNSFTRGVYYPDKVFRSSVLHSTQDLFLPFFSNVTW  
FHAIHVSGTNGTKRFDNPVLPFNDGVYFASTEKSNIIRGWIFGTTLDSTQSLNATNVVIKV  
CEFQFCNDPFLGVYHKNKSWMESEFRVYSSANNCTFEYVSQPFLMDLEGKQGNFKNLREF  
VFKNIDGYFKIYSKHTPINLVRDLPQGFSALEPLVDLPIGINITRFQTLALHRSYLTPGDSSSGW  
TAGAAAYYVGYLQPRFTLLKYNENGTITDAVDCALDPLSETKCTLKSFTVEKGIYQTSNFRVQP  
TESIVRFPNITNLCPFGEVFNATRFASVYAWNRKRISNCVADYSVLYNSASFSTFKCYGVSPTKL  
NDLCFTNVYADSFVIRGDEVQRQIAPGQTGKIADYNYKLPDDFTGCVIAWNSNNLDSKVGGNYN  
YLYRFLFRKSNLKPFERDISTEIQAGSTPCNGVEGFNCYFPLQSYGFQPTNGVGYQPYRVVVL  
SFELLHAPATVCGPKKSTNLVKNKCVNFNFNGLTGTGVLTESNKKFLPFQFGRDIADTTDAVR  
DPQTLEILDITPCSFGGVSVITPGTNTSNQVAVLYQDVNCTEVPVAIHADQLTPTWRVYSTGSN  
VFQTRAGCLIGAEHVNSYECDIPIGAGICASYQTQTNSPGSASSVASQSIIAYTMSLGAENSV  
YSNNSIAIPTNFTISVTTEILPVSMTKTSVDCTMYICGDSTECSNLLLQYGSFCTQLNRALTGIAV  
EQDKNTQEVFAQVKQIYKTPPIKDFGGFNFSQILPDPSKPSKRSFIEDLLFNKVTLADAGFIKQY  
GDCLGDIAARDLICAQKFNGLTVLPPLLTDEMAQYTSALLAGTITSGWTFGAGAALQIPFAMQM  
AYRFNGIGVTQNVLYENQKLIANQFNNSAIGKIQDLSSTASALGKLQDVVNQNAQALNTLVKQL  
SSNFGAISSVLNDILSRDPPEAEVQIDRLITGRLQSLQTYVTQQLIRAAEIRASANLAATKMSEC  
VLGQSKRVDFCGKGYHLSFPQSAPHGVVFLHVTVPAQEKNFTTAPAICHGDKAHFPREGV  
FVSNGTHWFVTQRNFYEPQIITDNTFVSGNCDVIGIVNNTVYDPLQPELDSGGDIKLLNEQV  
NKEMQSSNLYMSMSSWCYTHSLDGAGLFLFDHAAEEYEHAKKLIIFLNENNVPVQLTSISAPEH  
KFEGLTQIFQKAYEHEQHISESINNIVDHAIKSKDHATFNFLQWYVAEQHEEEVLFKDILDKIELIG  
NENHGLYLADQYVKGIKSRKS

### **HA-Ferritin protein**

MYRMQLLSIALSLALVTNSDTICIGYHANNSTDTVDTVLEKNVTVTHSVNLLLED SHNGKLCLLK  
GIAPLQLGNCSVAGWILGNPECELLISKESWSYIVETPNPENGTCFPGYFADYEELREQLSSVS  
SFERFEIFPKESSWPNHVTGVSASC SHNGKSSFYRNLLWLTGKNGLYPNLSKSYVNNKEKEV  
LVLWGVHHPNIGNQRALYHTENAYVSVVSSHYSRRFTPEIAKRPKVRDQEGRINYYWTLLEP  
GDTIIFEANGNLIAPWYAFALSRGFGSGIITSNAPMDECDKACQTPQGAINSSLPFQNVHPVTIG  
ECPKYVRSALRMVTGLRNIPQRETGGLFGAIAGFIEGGWTGMVDGWYGYHHQNEQSGSYA  
ADQKSTQNAINGITNKVNSVIEKMNTQFTAVGKEFNKLERRMENLNKKVDDGFLDIWTYNAELL  
VLENERTLDFHDSNVKNLYEKVKSQKNNAKEIGNGCFEFYHKCNNECMESVKNGTYDYPKY

SEESKLNREKIDGSSGGDIKLLNEQVNKEMQSSNLYMSMSSWCYTHSLDGAGLFLFDHAAEE  
YEHAKKLIIFLNENNVPVQLTSISAPEHKFEGLTQIFQKAYEHEQHISESINNIVDHAIKSKDHATF  
NFLQWYVAEQHEEEVLFKDILDKIELIGNENHGLYLADQYVKGIASRKS

#### Site 1 His-Ferritin

DIKLLNEQVNKEMQSSNLYMSMSSWCYTHSLDGAGLFLFDHAAEEYEHAKKLIIFLNENNVPV  
QLT**GGSHHHHHHGGSS**SISAPEHKFEGLTQIFQKAYEHEQHISESINNIVDHAIKSKDHATFNFLQ  
WYVAEQHEEEVLFKDILDKIELIGNENHGLYLADQYVKGIASRKS

#### Site 2 His-Ferritin

DIKLLNEQVNKEMQSSNLYMSMSSWCYTHSLDGAGLFLFDHAAEEYEHAKKLIIFLNENNVPV  
QLTSISAPE**GGSHHHHHHGGSH**KFEGLTQIFQKAYEHEQHISESINNIVDHAIKSKDHATFNFLQ  
WYVAEQHEEEVLFKDILDKIELIGNENHGLYLADQYVKGIASRKS

#### Site 3 His-Ferritin

DIKLLNEQVNKEMQSSNLYMSMSSWCYTHSLDGAGLFLFDHAAEEYEHAKKLIIFLNENNVPV  
QLTSISAPEH**GGSHHHHHHGGSK**FEGLTQIFQKAYEHEQHISESINNIVDHAIKSKDHATFNFLQ  
WYVAEQHEEEVLFKDILDKIELIGNENHGLYLADQYVKGIASRKS

#### Site 4 His-Ferritin

DIKLLNEQVNKEMQSSNLYMSMSSWCYTHSLDGAGLFLFDHAAEEYEHAKKLIIFLNENNVPV  
QLTSISAPEHKFEGLTQIFQKAYEHEQHISESINNIVDHAIKSKDHATFNFLQWYVAEQHEEEVLF  
KDILDKIELIGNE**GGSHHHHHHGGSN**HGLYLADQYVKGIASRKS

#### References

1. Powell, A. E. *et al.* A single immunization with spike-functionalized ferritin vaccines elicits neutralizing antibody responses against SARS-CoV-2 in mice. *ACS Cent. Sci.* **7**, 183–199 (2021).
2. Sievers, F. *et al.* Fast, scalable generation of high-quality protein multiple sequence alignments using Clustal Omega. *Mol. Syst. Biol.* **7**, 539 (2011).
